# Supplementary material for: Causal relationships between type 2 diabetes, glycemic traits and keratoconus
Source: Front Med (Lausanne). 2023 Nov 6;10:1264061. doi: 10.3389/fmed.2023.1264061 (PMC10658005; doi:10.3389/fmed.2023.1264061)
Supplement: Supplementary file 1 [file Table_1.XLSX]

## Sheet: table2
Table S1. Effect Estimates of the Associations between Genetically Predicted Type 2 Diabetes and Risk of Keratoconus
Variant rsID	chr	position	Effect Allele	Other Allele	Association with exposure			Association with keraroconus			F
					Beta	SE	P	Beta	SE	P
Type 2 diabetes (adjusted for BMI)
rs10244051	7	15063833	G	T	0.0479	0.0062	7.87e-18	-0.0401	0.0236	0.08905	59.6877
rs10758593	9	4292083	A	G	0.0393	0.0062	2.56e-11	-0.0115	0.0236	0.6277	40.179
rs1077394	6	31610384	T	C	0.0369	0.0068	3.92e-08	0.0062	0.0296	0.8351	29.4464
rs10842994	12	27965150	T	C	-0.0575	0.0081	7.6e-13	-0.0026	0.0316	0.9343	50.3921
rs10906115	10	12314997	G	A	-0.0339	0.0063	4.96e-08	0.0247	0.0238	0.2984	28.9545
rs10965250	9	22133284	A	G	-0.1298	0.0093	3.71e-46	0.0444	0.0337	0.1873	194.796
rs11063069	12	4374373	G	A	0.0469	0.0078	3.44e-10	0.0046	0.0301	0.8781	36.1538
rs11603334	11	72432985	A	G	-0.0881	0.009	1.72e-24	0.0178	0.0343	0.6033	95.8217
rs11708067	3	123065778	G	A	-0.0839	0.0078	9.32e-31	0.0413	0.0283	0.1454	115.7
rs12571751	10	80942631	G	A	-0.0559	0.0062	3.14e-22	0.0061	0.0248	0.8043	81.29
rs1260326	2	27730940	C	T	0.0543	0.0065	3.18e-18	-0.0255	0.0252	0.3114	69.7863
rs13133548	4	89740128	A	G	0.0334	0.0066	5e-08	-0.0111	0.0236	0.6393	25.6096
rs13266634	8	118184783	T	C	-0.0897	0.0068	1.3e-47	-0.0013	0.027	0.9602	174.006
rs13389219	2	165528876	T	C	-0.0715	0.007	1.32e-29	0.0039	0.0259	0.8807	104.331
rs1359790	13	80717156	A	G	-0.0585	0.0073	1.34e-15	-0.02	0.0292	0.4942	64.2189
rs16826069	1	39797055	G	A	0.0465	0.0079	6.97e-09	-0.0058	0.0301	0.8484	34.6457
rs1801212	4	6302519	A	G	0.063	0.0073	7.09e-21	0.033	0.029	0.2562	74.4788
rs1801282	3	12393125	G	C	-0.0916	0.011	2.68e-19	-0.0611	0.0387	0.1146	69.343
rs2237895	11	2857194	C	A	0.0797	0.0066	1.83e-38	0.005	0.0246	0.84	145.823
rs2395163	6	32387809	C	T	0.0488	0.0078	1.72e-09	0.0335	0.0381	0.3789	39.1424
rs243021	2	60584819	A	G	0.0402	0.0065	4.6e-11	-0.0118	0.0247	0.6324	38.2492
rs2796441	9	84308948	A	G	-0.04	0.0063	4.86e-11	-0.0271	0.0244	0.2655	40.3122
rs28265	22	30200761	G	C	-0.0885	0.0126	4.45e-14	0.115	0.0445	0.009808	49.3336
rs2943641	2	227093745	C	T	0.0603	0.0069	1.43e-18	-0.0009	0.026	0.9728	76.3719
rs340874	1	214159256	C	T	0.0486	0.0063	1.41e-15	-0.0196	0.0242	0.4176	59.5098
rs35658696	5	102338811	G	A	0.1222	0.0175	7.44e-15	-0.1102	0.0684	0.1073	48.76
rs35720761	2	43519977	T	C	-0.0721	0.0104	8.31e-16	0.0896	0.0393	0.02273	48.0619
rs4402960	3	185511687	T	G	0.0919	0.0066	8.31e-49	-0.024	0.0249	0.3342	193.883
rs4457053	5	76424949	A	G	-0.0466	0.0075	3.68e-13	0.0021	0.0278	0.9388	38.6053
rs4502156	15	62383155	C	T	-0.04	0.0065	9.55e-11	0.0249	0.024	0.3009	37.8696
rs459193	5	55806751	G	A	0.0537	0.0072	6.71e-15	0.0144	0.0258	0.5771	55.6264
rs4607103	3	64711904	T	C	-0.0415	0.0069	6.76e-10	0.0144	0.0258	0.577	36.1739
rs4812831	20	43018260	A	G	0.0587	0.01	1.32e-08	-0.0159	0.0385	0.6807	34.4567
rs5015480	10	94465559	T	C	-0.0709	0.0065	1.36e-30	0.0376	0.0237	0.1116	118.977
rs516946	8	41519248	C	T	0.0652	0.0076	9.32e-20	0.0172	0.0278	0.5349	73.5978
rs5219	11	17409572	C	T	-0.063	0.0065	1.52e-22	-0.0009	0.0265	0.9718	93.9402
rs55834942	12	121437114	A	G	-0.0514	0.0085	1.35e-12	0.0736	0.0334	0.02767	36.5667
rs58542926	19	19379549	T	C	0.0836	0.0116	3.36e-15	0.056	0.0447	0.2102	51.939
rs60980157	9	139235415	T	C	-0.0615	0.0079	6.63e-16	0.0099	0.0282	0.7265	60.6029
rs6813195	4	153520475	T	C	-0.0461	0.007	1.53e-12	-0.008	0.0253	0.752	43.3713
rs6905288	6	43758873	A	G	0.0401	0.0065	5.77e-11	0.0005	0.0259	0.9861	38.0592
rs7177055	15	77832762	A	G	0.0528	0.0072	5.65e-14	0.0054	0.0252	0.8301	53.7774
rs7202877	16	75247245	G	T	-0.0726	0.0099	3.14e-14	0.0065	0.0398	0.8699	53.7774
rs730497	7	44223721	A	G	0.0413	0.0084	3.07e-08	-0.0666	0.0322	0.03895	24.1734
rs731839	19	33899065	A	G	-0.0443	0.0067	7.42e-13	-0.0455	0.0255	0.07411	43.7175
rs7501939	17	36101156	C	T	-0.0622	0.0064	2.38e-24	0.0142	0.0252	0.5729	94.4535
rs7756992	6	20679709	G	A	0.1073	0.0067	1.33e-61	-0.013	0.026	0.6161	256.476
rs7903146	10	114758349	T	C	0.241	0.0069	1e-200	-0.0373	0.026	0.1516	1219.92
rs8042680	15	91521337	A	C	0.0427	0.0068	1.66e-10	0.0026	0.0268	0.9239	39.4307
rs8108269	19	46158513	G	T	0.0543	0.0072	5.15e-16	0.0047	0.0264	0.8594	56.8764
rs864745	7	28180556	C	T	-0.0701	0.0065	2.87e-30	-0.0545	0.0241	0.02392	116.307
rs9379084	6	7231843	A	G	-0.0946	0.0129	1.47e-17	0.0418	0.0376	0.2654	53.7774
rs9388489	6	126698719	G	A	0.0345	0.0067	1.19e-08	0.0348	0.0253	0.1689	26.5146
rs972283	7	130466854	G	A	0.0473	0.007	1.51e-12	-0.0062	0.0241	0.796	45.6587
Type 2 diabetes(unadjusted for BMI)
rs10146997	14	79945162	G	A	0.0516	0.009	5.33e-10	-0.0151	0.0297	0.6121	32.8709
rs10758593	9	4292083	A	G	0.0409	0.0075	6.46e-09	-0.0115	0.0236	0.6277	29.7386
rs1077394	6	31610384	T	C	0.052	0.0079	1.01e-11	0.0062	0.0296	0.8351	43.3261
rs10842994	12	27965150	T	C	-0.0626	0.0095	3.91e-12	-0.0026	0.0316	0.9343	43.4209
rs10965250	9	22133284	A	G	-0.1173	0.0109	4.87e-30	0.0444	0.0337	0.1873	115.808
rs11063069	12	4374373	G	A	0.0468	0.0091	9.34e-09	0.0046	0.0301	0.8781	26.4488
rs11603334	11	72432985	A	G	-0.0645	0.01	4.09e-12	0.0178	0.0343	0.6033	41.6022
rs11708067	3	123065778	G	A	-0.0777	0.0091	1.03e-20	0.0413	0.0283	0.1454	72.9048
rs12571751	10	80942631	G	A	-0.062	0.0074	1.75e-20	0.0061	0.0248	0.8043	70.1968
rs12602912	17	65870073	T	C	0.0489	0.0093	1.12e-08	0.0626	0.0291	0.03168	27.6471
rs1260326	2	27730940	C	T	0.0569	0.0077	1.04e-15	-0.0255	0.0252	0.3114	54.606
rs13266634	8	118184783	T	C	-0.0831	0.008	5.55e-30	-0.0013	0.027	0.9602	107.899
rs13389219	2	165528876	T	C	-0.0656	0.0077	6.11e-21	0.0039	0.0259	0.8807	72.5811
rs1359790	13	80717156	A	G	-0.0542	0.0084	2.76e-11	-0.02	0.0292	0.4942	41.6329
rs16826069	1	39797055	G	A	0.055	0.009	8.86e-11	-0.0058	0.0301	0.8484	37.3454
rs17782313	18	57851097	C	T	0.0499	0.0088	1.64e-08	-0.0235	0.0267	0.3793	32.1538
rs1801212	4	6302519	A	G	0.0687	0.0082	6.68e-20	0.033	0.029	0.2562	70.1912
rs1801282	3	12393125	G	C	-0.0736	0.0122	4.81e-12	-0.0611	0.0387	0.1146	36.3943
rs2112347	5	75015242	G	T	-0.0563	0.0077	1.79e-14	-0.0124	0.024	0.6039	53.4604
rs2191349	7	15064309	T	G	0.0526	0.0074	6.28e-16	-0.038	0.0236	0.107	50.5249
rs2237895	11	2857194	C	A	0.074	0.0078	4.81e-25	0.005	0.0246	0.84	90.006
rs243021	2	60584819	A	G	0.0483	0.0075	6.33e-12	-0.0118	0.0247	0.6324	41.4733
rs2943641	2	227093745	C	T	0.0589	0.0077	1.6e-15	-0.0009	0.026	0.9728	58.5122
rs340874	1	214159256	C	T	0.05	0.0075	1.09e-12	-0.0196	0.0242	0.4176	44.4441
rs35658696	5	102338811	G	A	0.1189	0.0186	5.88e-12	-0.1102	0.0684	0.1073	40.8634
rs35720761	2	43519977	T	C	-0.0729	0.0119	1.14e-12	0.0896	0.0393	0.02273	37.5282
rs41278853	22	30416527	G	A	-0.0847	0.014	4e-11	0.1417	0.0448	0.001559	36.6023
rs4430796	17	36098040	A	G	-0.0612	0.0075	1.32e-18	0.0441	0.0249	0.07667	66.5852
rs4457053	5	76424949	A	G	-0.0454	0.0085	2.93e-11	0.0021	0.0278	0.9388	28.528
rs459193	5	55806751	G	A	0.0529	0.0091	3.73e-10	0.0144	0.0258	0.5771	33.7929
rs4607517	7	44235668	A	G	0.0578	0.01	1.87e-10	-0.0467	0.0328	0.1553	33.4082
rs4805885	19	33906123	C	T	-0.0384	0.0077	4.52e-08	-0.0117	0.0251	0.6408	24.8701
rs5015480	10	94465559	T	C	-0.0796	0.0078	2.1e-26	0.0376	0.0237	0.1116	104.144
rs516946	8	41519248	C	T	0.0709	0.0092	2.6e-17	0.0172	0.0278	0.5349	59.3901
rs5215	11	17408630	T	C	-0.0616	0.0076	3.76e-17	0.0013	0.0264	0.9592	65.6949
rs55834942	12	121437114	A	G	-0.0571	0.0093	1.17e-10	0.0736	0.0334	0.02767	37.6967
rs58542926	19	19379549	T	C	0.0822	0.0139	1.67e-10	0.056	0.0447	0.2102	34.9712
rs60980157	9	139235415	T	C	-0.0666	0.0089	4.79e-15	0.0099	0.0282	0.7265	55.9971
rs6795735	3	64705365	T	C	-0.0419	0.0076	7.95e-09	0.0322	0.025	0.1968	30.3947
rs6813195	4	153520475	T	C	-0.0432	0.0084	1.28e-08	-0.008	0.0253	0.752	26.4488
rs7177055	15	77832762	A	G	0.0608	0.0086	2.42e-13	0.0054	0.0252	0.8301	49.9813
rs7202877	16	75247245	G	T	-0.0843	0.0123	8.18e-13	0.0065	0.0398	0.8699	46.9723
rs7651090	3	185513392	G	A	0.0909	0.0079	3.93e-33	-0.0224	0.0249	0.3681	132.395
rs769449	19	45410002	A	G	-0.0573	0.0115	3.21e-09	-0.0095	0.0408	0.8162	24.8262
rs7756992	6	20679709	G	A	0.104	0.0081	1.22e-41	-0.013	0.026	0.6161	164.852
rs781852	17	3953102	G	A	0.049	0.0077	9.12e-11	0.0237	0.0245	0.3342	40.4956
rs7903146	10	114758349	T	C	0.2367	0.0082	1e-200	-0.0373	0.026	0.1516	833.232
rs8042680	15	91521337	A	C	0.0464	0.008	5.71e-09	0.0026	0.0268	0.9239	33.6398
rs8108269	19	46158513	G	T	0.052	0.0085	7.2e-11	0.0047	0.0264	0.8594	37.4254
rs864745	7	28180556	C	T	-0.0632	0.0074	2.23e-19	-0.0545	0.0241	0.02392	72.9403
rs9379084	6	7231843	A	G	-0.0935	0.0147	1.6e-12	0.0418	0.0376	0.2654	40.4563
Chr : chromosome; Beta: beta-coefficient; F : F-statistic; ; SE: standard error.
