# Supplementary material for: Causal relationships between type 2 diabetes, glycemic traits and keratoconus
Source: Front Med (Lausanne). 2023 Nov 6;10:1264061. doi: 10.3389/fmed.2023.1264061 (PMC10658005; doi:10.3389/fmed.2023.1264061)
Supplement: Supplementary file 2 [file Table_2.XLSX]

## Sheet: table3
Table S2. Effect Estimates of the Associations between Genetically Predicted Glycemic Traits and Risk of KC
Variant rsID	chr	position	Effect Allele	Other Allele	Association with exposure			Association with KC			F
					Beta	SE	P	Beta	SE	P
Adiponectin
rs1108842	3	52720080	C	A	0.029927	0.004382	3.66e-11	0.0469	0.0249	0.05986	46.6393
rs12051272	16	82663288	T	G	-0.276549	0.018107	1e-200	-0.007	0.0844	0.9342	233.236
rs1597466	3	150055561	T	G	-0.043765	0.007542	1.89e-08	0.0289	0.0366	0.4306	33.6706
rs17366568	3	186570453	A	G	-0.154104	0.008685	1e-200	-0.0143	0.039	0.713	314.813
rs2062632	3	186461181	C	T	-0.054666	0.005893	2.52e-19	0.0207	0.0302	0.4943	86.0462
rs2927324	16	81512821	T	C	0.031514	0.00451	1.29e-11	-0.0674	0.0236	0.004333	48.823
rs601339	12	123174743	G	A	0.039007	0.005719	3.87e-11	-0.0241	0.0312	0.4384	46.5174
rs6810075	3	186548565	C	T	-0.066402	0.004788	1e-200	-0.0195	0.0258	0.4488	192.32
rs731839	19	33899065	A	G	0.036626	0.004838	2.2e-13	-0.0455	0.0255	0.07411	57.3083
rs7615090	3	186591003	G	T	-0.058149	0.008464	2.81e-11	-0.0374	0.0313	0.2333	47.1947
rs7955516	12	20498036	C	A	0.026448	0.004594	2.43e-08	0.0133	0.0251	0.5946	33.1416
rs7964945	12	124437668	A	T	0.036875	0.006419	2.61e-08	-0.0548	0.0341	0.1079	32.9989
rs8042532	15	74255230	G	T	-0.339734	0.055421	2.86e-09	0.1949	0.0588	0.000924	37.568
Fasting glucose
rs10811661	9	22134094	C	T	-0.024	0.0028	5.64937e-18	0.018	0.0322	0.5771	73.4683
rs10814916	9	4293150	C	A	0.016	0.0022	2.25996e-13	-0.0033	0.0246	0.8939	52.8918
rs11195502	10	113039667	T	C	-0.032	0.0037	1.97015e-18	0.0114	0.0351	0.7463	74.798
rs11558471	8	118185733	G	A	-0.029	0.0023	7.8001e-37	-0.0045	0.0268	0.8657	158.977
rs11603334	11	72432985	A	G	-0.019	0.0028	1.11995e-11	0.0178	0.0343	0.6033	46.0452
rs11607883	11	45839709	A	G	-0.021	0.0021	6.31975e-24	0.0234	0.0254	0.3568	99.9985
rs11619319	13	28487599	G	A	0.02	0.0024	1.33015e-15	-0.0022	0.0289	0.9396	69.4434
rs11708067	3	123065778	G	A	-0.023	0.0026	1.29987e-18	0.0413	0.0283	0.1454	78.2533
rs11715915	3	49455330	T	C	-0.012	0.0022	4.90004e-08	0.0219	0.0257	0.3933	29.7516
rs1260326	2	27730940	C	T	0.029	0.0021	2.1702e-41	-0.0255	0.0252	0.3114	190.7
rs1280	3	170713290	C	T	-0.026	0.0031	8.56052e-18	0.0354	0.0321	0.2711	70.3423
rs12888855	14	100830818	A	C	-0.016	0.0025	5.03999e-10	0.0175	0.0298	0.5565	40.9594
rs16913693	9	111680359	G	T	-0.043	0.0066	3.50994e-11	0.0264	0.0604	0.6618	42.4466
rs17168486	7	14898282	T	C	0.031	0.0028	3.1703e-28	-0.0259	0.0303	0.3934	122.575
rs174576	11	61603510	A	C	-0.02	0.0022	1.18005e-18	0.0613	0.0256	0.01658	82.6434
rs2191349	7	15064309	T	G	0.029	0.0021	1.27997e-42	-0.038	0.0236	0.107	190.7
rs3829109	9	139256766	A	G	-0.017	0.0027	1.13e-10	0.0134	0.0285	0.6386	39.6428
rs4502156	15	62383155	C	T	-0.022	0.0021	1.38007e-25	0.0249	0.024	0.3009	109.749
rs4869272	5	95539448	T	C	0.018	0.0022	1.02e-15	-0.0665	0.0252	0.008453	66.9411
rs560887	2	169763148	C	T	0.071	0.0025	1.39959e-178	-0.0519	0.0283	0.06613	806.548
rs6072275	20	39743905	A	G	0.016	0.0028	1.66001e-08	-0.0424	0.0389	0.2755	32.6526
rs6113722	20	22557099	A	G	-0.035	0.0053	2.49e-11	0.0933	0.0512	0.06842	43.6092
rs6943153	7	50791579	C	T	-0.015	0.0022	1.63005e-12	-0.0075	0.0255	0.7669	46.4869
rs6975024	7	44231886	C	T	0.061	0.0029	2.88005e-99	-0.0466	0.0328	0.1561	442.443
rs749067	11	47318157	C	T	-0.017	0.0022	6.12068e-15	0.0605	0.0254	0.01728	59.7098
rs7651090	3	185513392	G	A	0.013	0.0023	1.75001e-08	-0.0224	0.0249	0.3681	31.9466
rs7903146	10	114758349	T	C	0.022	0.0024	2.71019e-20	-0.0373	0.026	0.1516	84.0265
rs882020	7	44178743	T	C	0.021	0.003	3.04018e-12	0.0474	0.0342	0.1666	48.9993
rs9368222	6	20686996	A	C	0.014	0.0023	1e-09	-0.0164	0.0268	0.5404	37.0505
rs983309	8	9177732	G	T	-0.026	0.0033	6.29071e-15	-0.0021	0.0362	0.9531	62.0744
HbA1c
rs1046896	17	78278822	C	T	-0.028	0.0017	4.456e-64	0.0051	0.0251	0.8393	271.276
rs10774625	12	110394602	A	G	-0.0088	0.0016	1.464e-08	-0.0225	0.028	0.4207	30.2495
rs11248914	16	233563	C	T	-0.014	0.0019	2.563e-14	-0.0315	0.0255	0.2158	54.2928
rs11603334	11	72110633	A	G	-0.012	0.0021	6.853e-09	0.0178	0.0343	0.6033	32.6525
rs11708067	3	124548468	A	G	0.013	0.0019	1.419e-12	-0.0413	0.0283	0.1454	46.8136
rs11964178	6	109668728	A	G	0.0096	0.0016	6.379e-10	0.0497	0.0242	0.03983	35.9994
rs12368284	12	46659448	A	G	0.012	0.002	2.924e-10	0.0132	0.0256	0.607	35.9994
rs12621844	2	48268239	C	T	-0.0099	0.0018	1.865e-08	-0.0007	0.026	0.9782	30.2495
rs13134327	4	144879245	A	G	0.013	0.0017	2.636e-15	-0.0369	0.0249	0.1383	58.4766
rs13266634	8	118253964	C	T	0.015	0.0017	4.533e-20	0.0013	0.027	0.9602	77.8534
rs1387153	11	92313476	C	T	-0.019	0.0019	2.109e-24	0.091	0.0257	0.0003928	99.9984
rs1547247	6	135432529	A	G	-0.014	0.0017	1.73e-17	-0.0087	0.0283	0.7589	67.819
rs17509001	2	23874735	C	T	0.018	0.0023	1.935e-15	0.0535	0.0332	0.1075	61.2466
rs17533903	19	17117523	A	G	0.015	0.0022	5.267e-12	-0.0312	0.0302	0.3019	46.4869
rs17747324	10	114742493	C	T	0.015	0.0023	6.122e-11	0.0018	0.0293	0.9514	42.5324
rs1800562	6	26201120	A	G	-0.04	0.0036	4.669e-28	0.0108	0.066	0.8697	123.455
rs2246434	1	156885079	A	G	0.019	0.0018	1.985e-27	-0.012	0.0287	0.6762	111.418
rs2383208	9	22122076	A	G	0.014	0.0021	7.042e-12	-0.01	0.0308	0.7466	44.4437
rs267738	1	149207249	G	T	-0.011	0.0019	2.594e-09	-0.0891	0.0334	0.007569	33.5175
rs2979422	7	44128880	C	T	0.015	0.0023	1.097e-10	0.0547	0.0314	0.08105	42.5324
rs3782123	11	195198	A	C	-0.013	0.002	1.509e-10	0.0105	0.0256	0.6803	42.2493
rs423117	13	112394108	C	T	-0.019	0.0027	1.298e-12	0.0408	0.0345	0.2376	49.5191
rs4607517	7	44202193	A	G	0.031	0.0024	8.755e-38	-0.0467	0.0328	0.1553	166.838
rs4737009	8	41749562	A	G	0.021	0.002	4.484e-27	-0.0173	0.0276	0.5306	110.248
rs4745982	10	70759849	G	T	-0.095	0.0056	2.87e-65	0.0109	0.0526	0.8359	287.782
rs560887	2	169471394	C	T	0.028	0.0018	1.48e-58	-0.0519	0.0283	0.06613	241.971
rs579459	9	135143989	C	T	0.011	0.0019	9.422e-09	0.0674	0.0293	0.02139	33.5175
rs592423	6	139882386	A	C	0.0091	0.0017	3.959e-08	-0.0019	0.0238	0.9372	28.6535
rs6474359	8	41668351	C	T	-0.044	0.0053	1.504e-16	-0.0054	0.0538	0.9193	68.9202
rs7040409	9	90693056	C	G	0.028	0.0037	2.563e-14	0.0535	0.0496	0.2801	57.2672
rs7616006	3	12242648	A	G	0.01	0.0017	5.068e-10	-0.0474	0.0243	0.05144	34.6015
rs8192675	3	172207577	C	T	-0.011	0.0017	1.378e-11	0.0566	0.0258	0.0284	41.8678
rs837763	16	87381230	C	T	-0.017	0.0016	1.679e-28	0.0033	0.0239	0.8914	112.889
rs855791	22	35792882	A	G	0.017	0.0016	3.439e-28	0.0271	0.0256	0.2895	112.889
rs9818758	3	49357929	A	G	0.012	0.002	7.735e-10	0.0405	0.0331	0.2207	35.9994
rs9914988	17	24207230	A	G	0.013	0.002	2.765e-11	0.0087	0.0272	0.7497	42.2493
rs9935401	16	52374339	A	G	0.0099	0.0018	1.865e-08	-0.0164	0.024	0.4945	30.2495
Proinsulin levels
rs10501320	11	47293799	C	G	-0.11	0.008	2.054e-45	0.0785	0.0292	0.007203	189.027
rs11558471	8	118185733	G	A	-0.057	0.0079	4.21308e-13	-0.0045	0.0268	0.8657	52.0492
rs11603334	11	72432985	A	G	0.13	0.01	3.24863e-38	0.0178	0.0343	0.6033	168.968
rs4502156	15	62383155	C	T	-0.048	0.0072	3.8054e-11	0.0249	0.024	0.3009	44.4361
rs4790333	17	2262703	T	C	0.04	0.0071	2.15601e-08	0.0029	0.025	0.9066	31.7338
rs6101962	20	39021330	G	A	-0.15	0.022	9.89464e-12	0.0506	0.0371	0.1724	46.4789
rs7903146	10	114758349	T	C	0.067	0.0077	3.48418e-18	-0.0373	0.026	0.1516	75.6984
Chr : chromosome; Beta: beta-coefficient; F : F-statistic; ; SE: standard error.
